# Supplementary material
Source: PubMed Central journal article supplement (PMC2928690)
Supplement: emboj2010136s1.pdf [file emboj2010136s1.pdf]

# Wilting\_Supplemental Figure 1

A

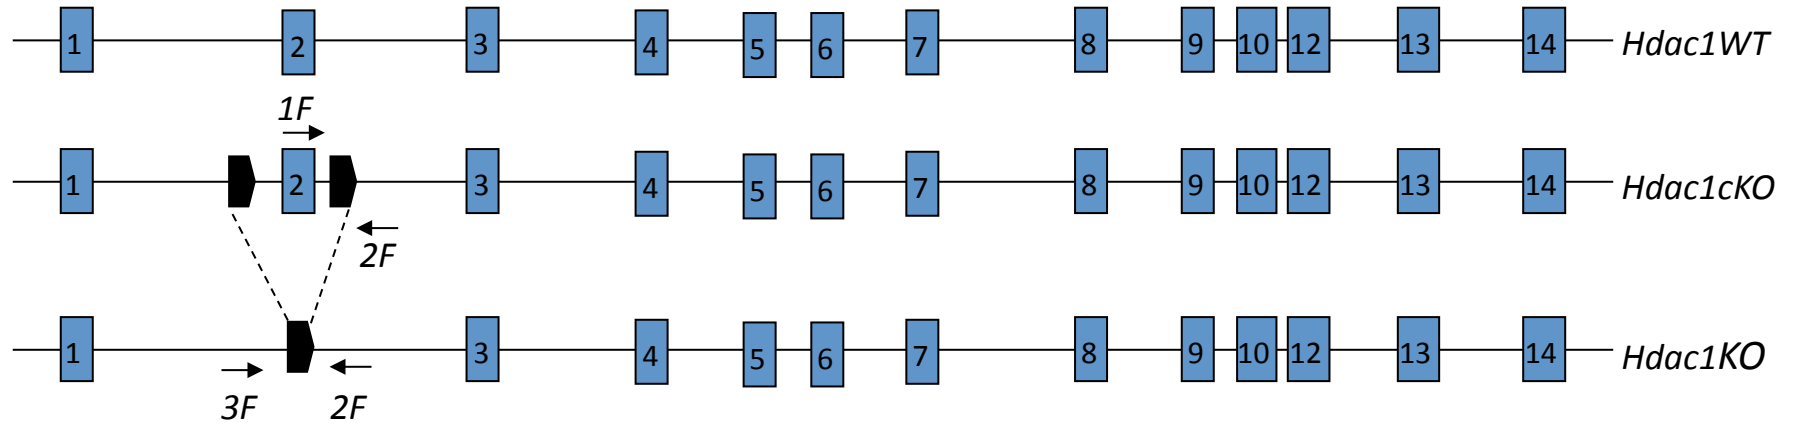

B

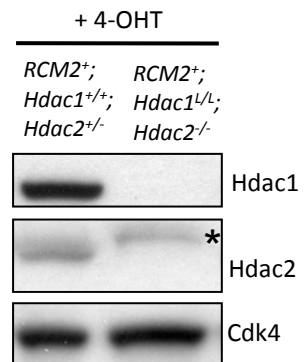

# Wilting\_Supplemental Figure 2

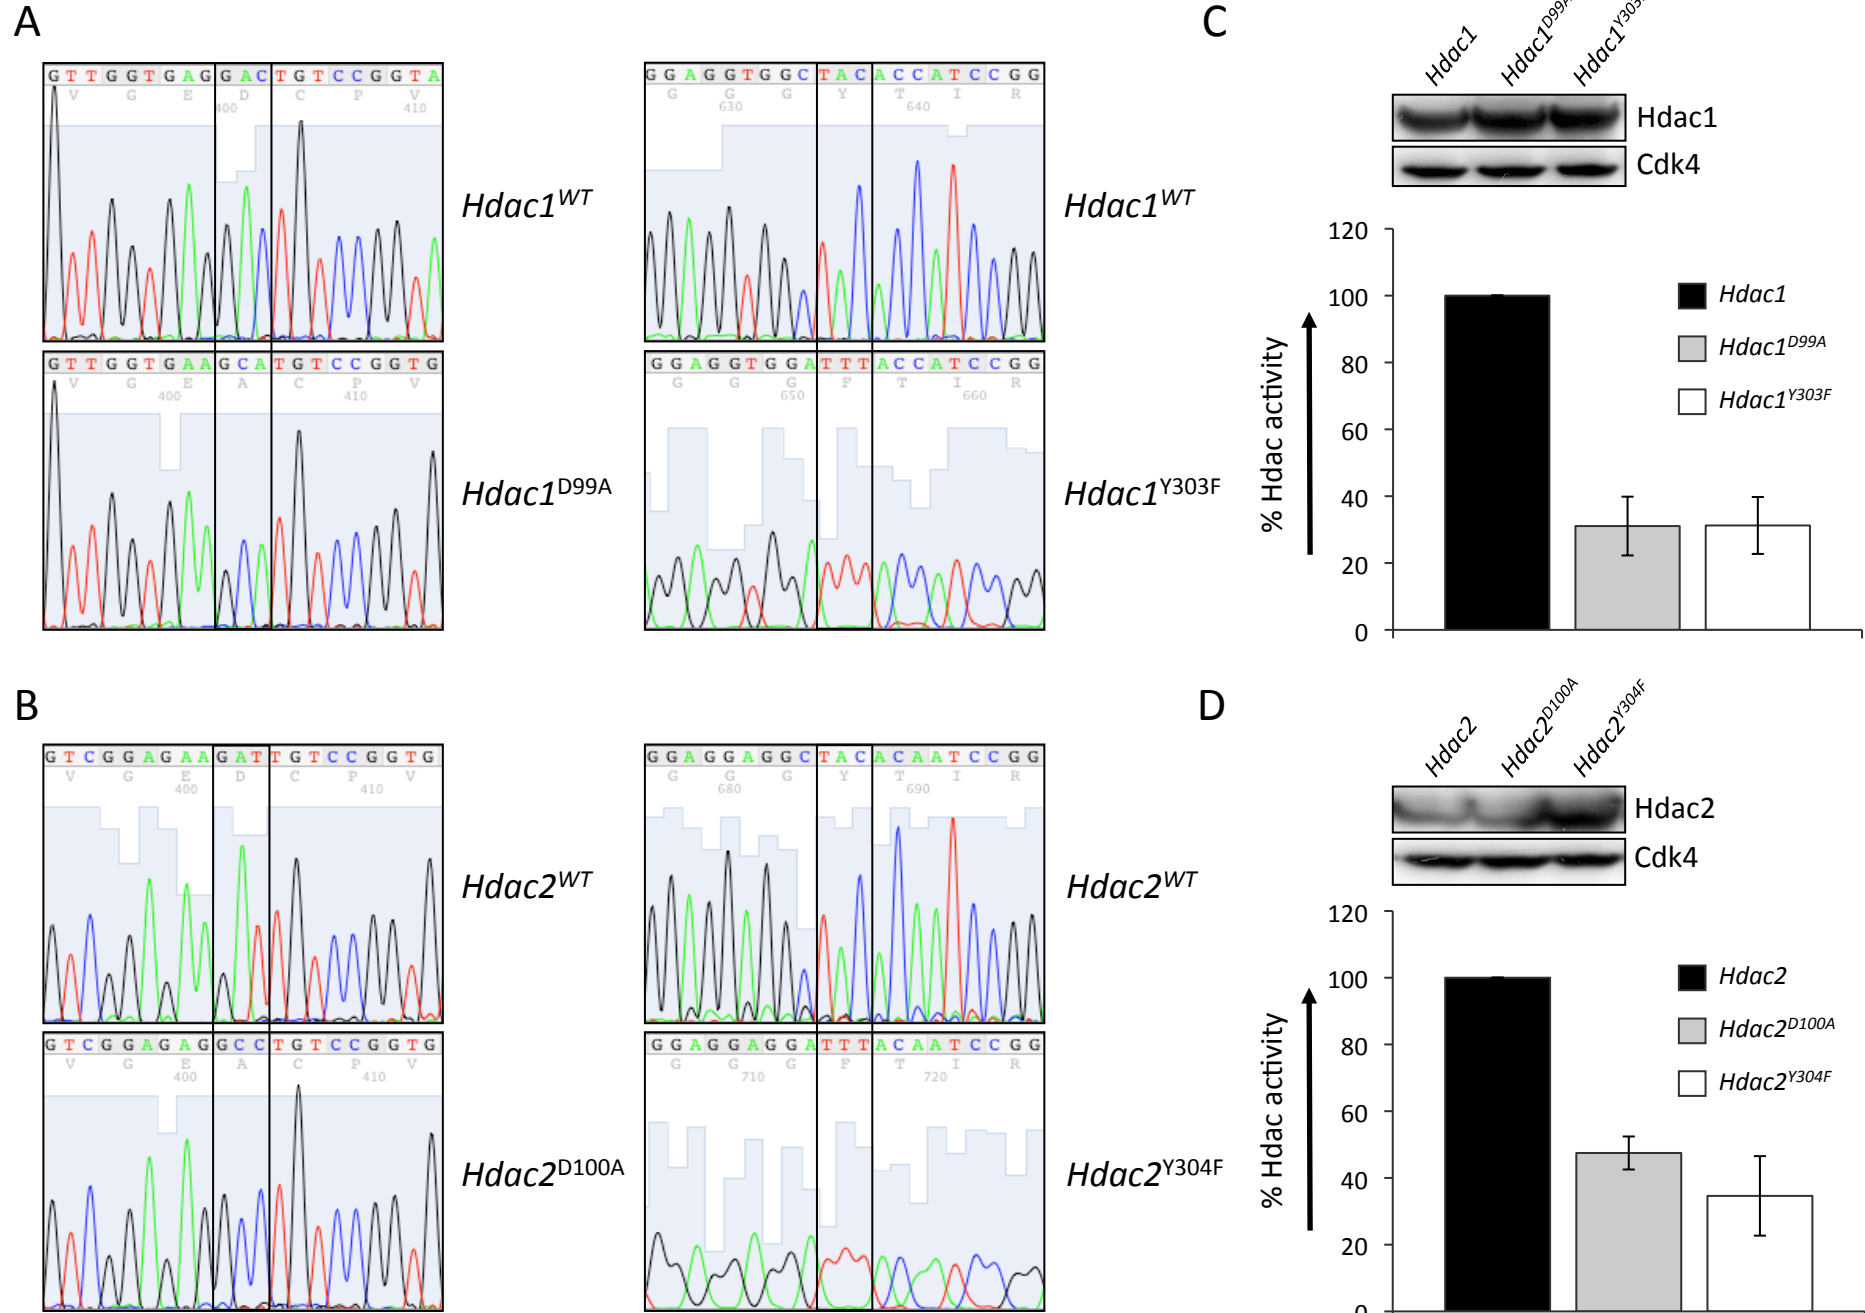

# Wilting\_Supplemental Figure 3

A

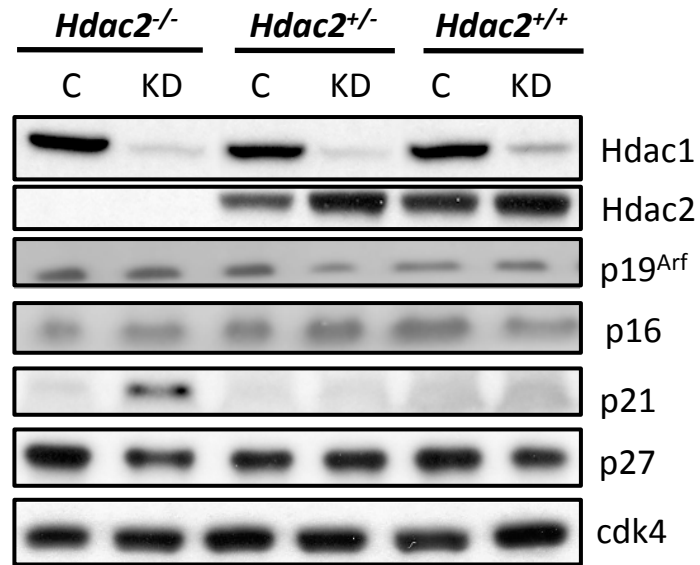

B

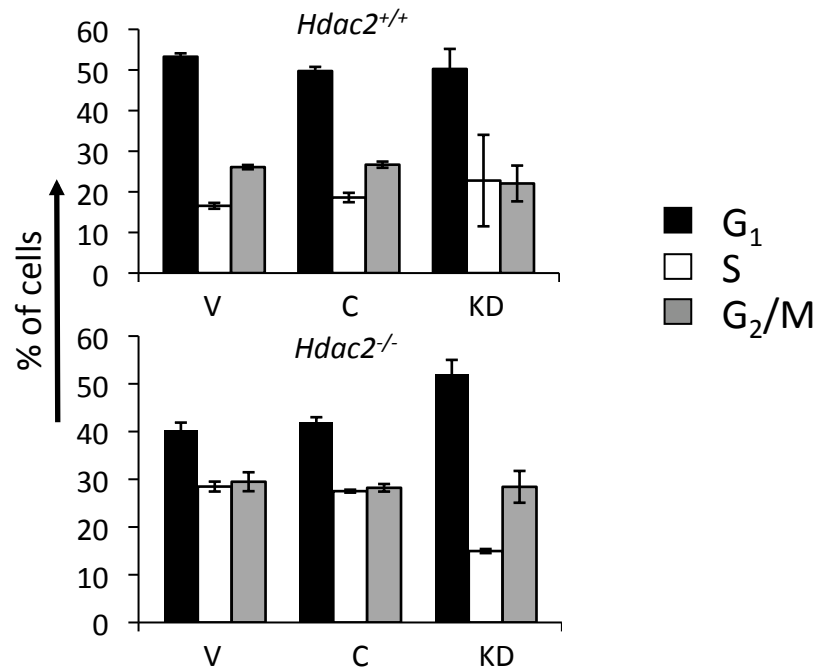

C

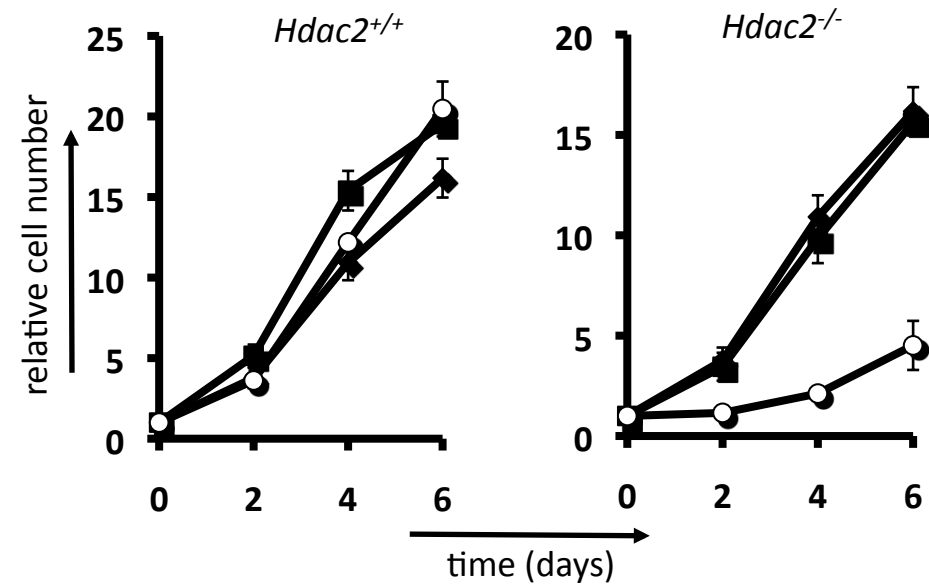

D

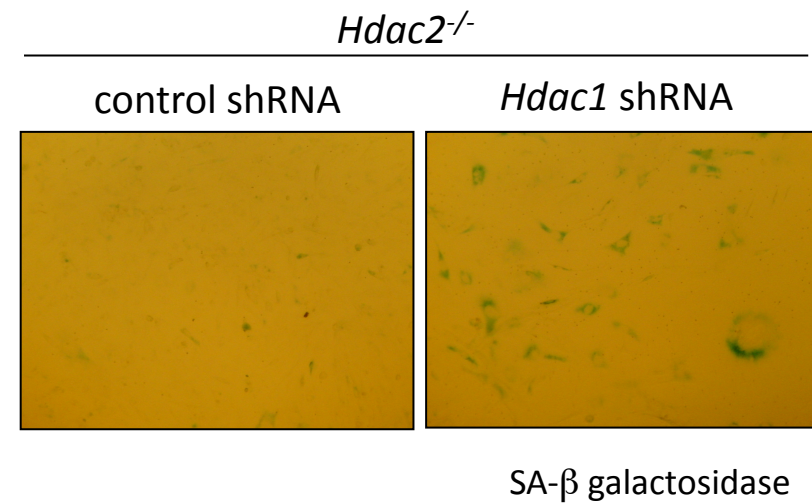

Wilting\_Supplemental Figure 4

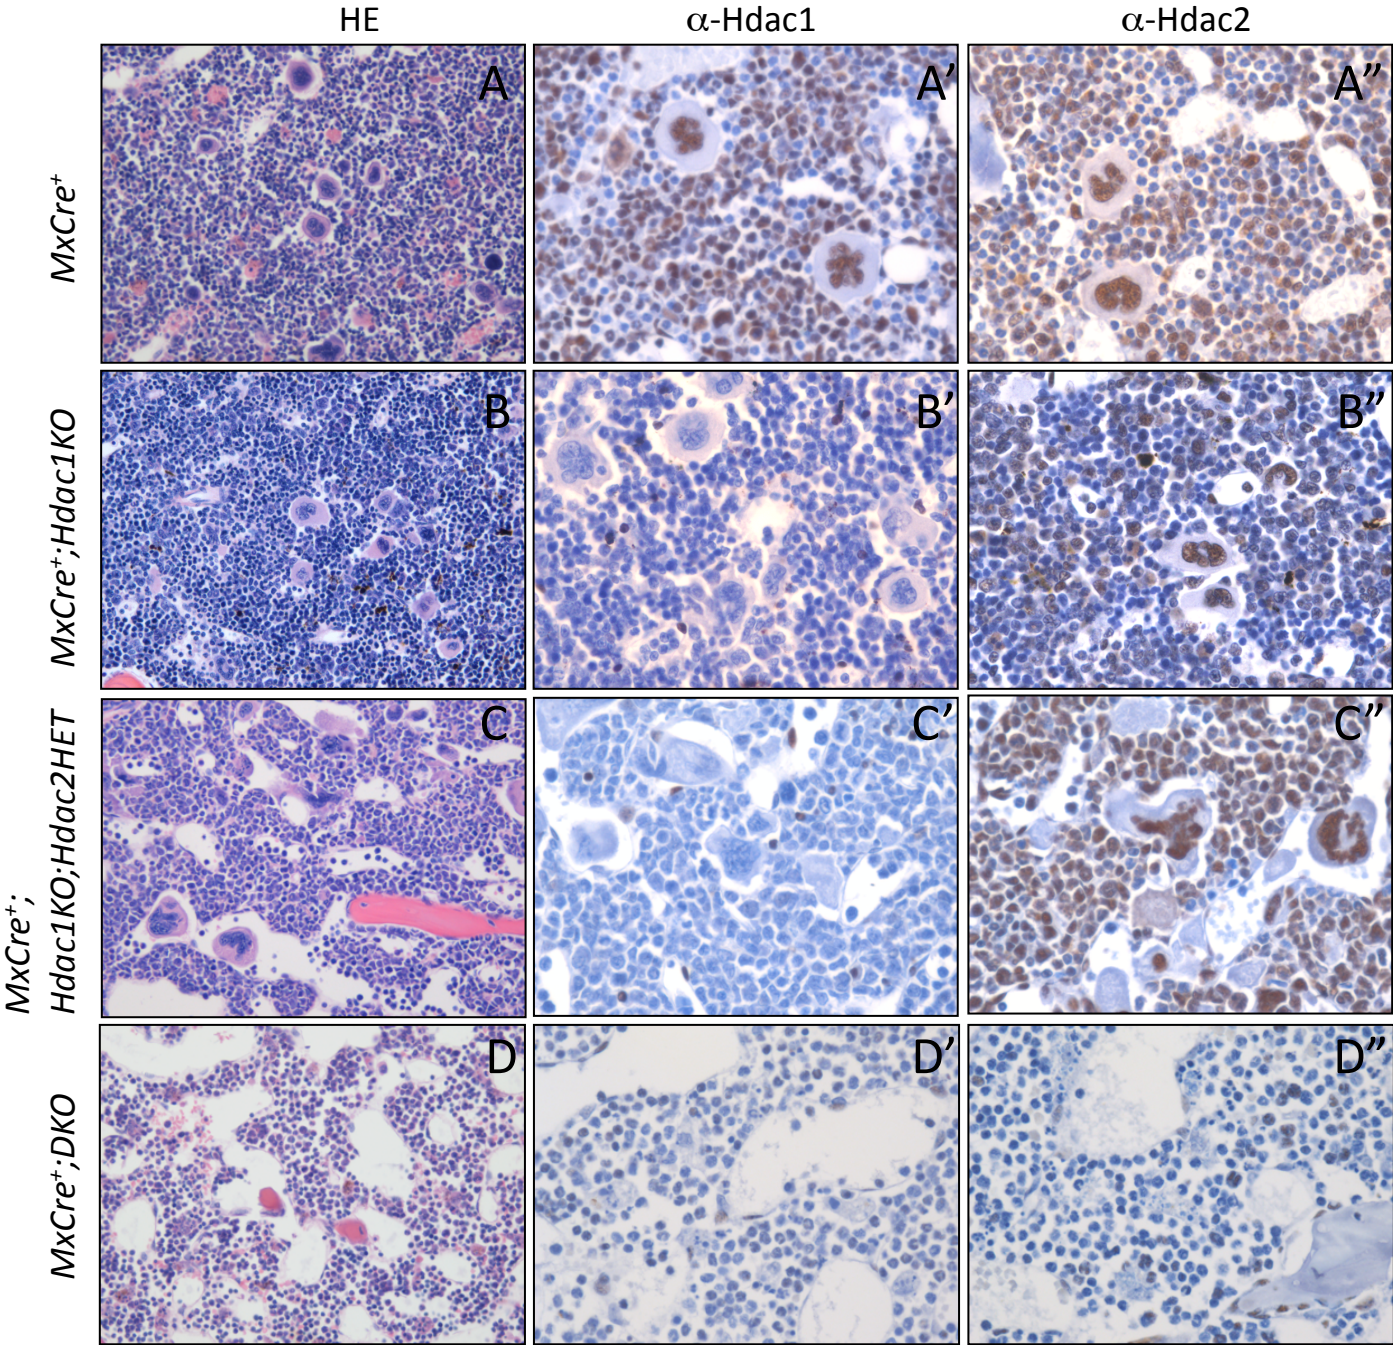

Wilting\_Supplemental Figure 5

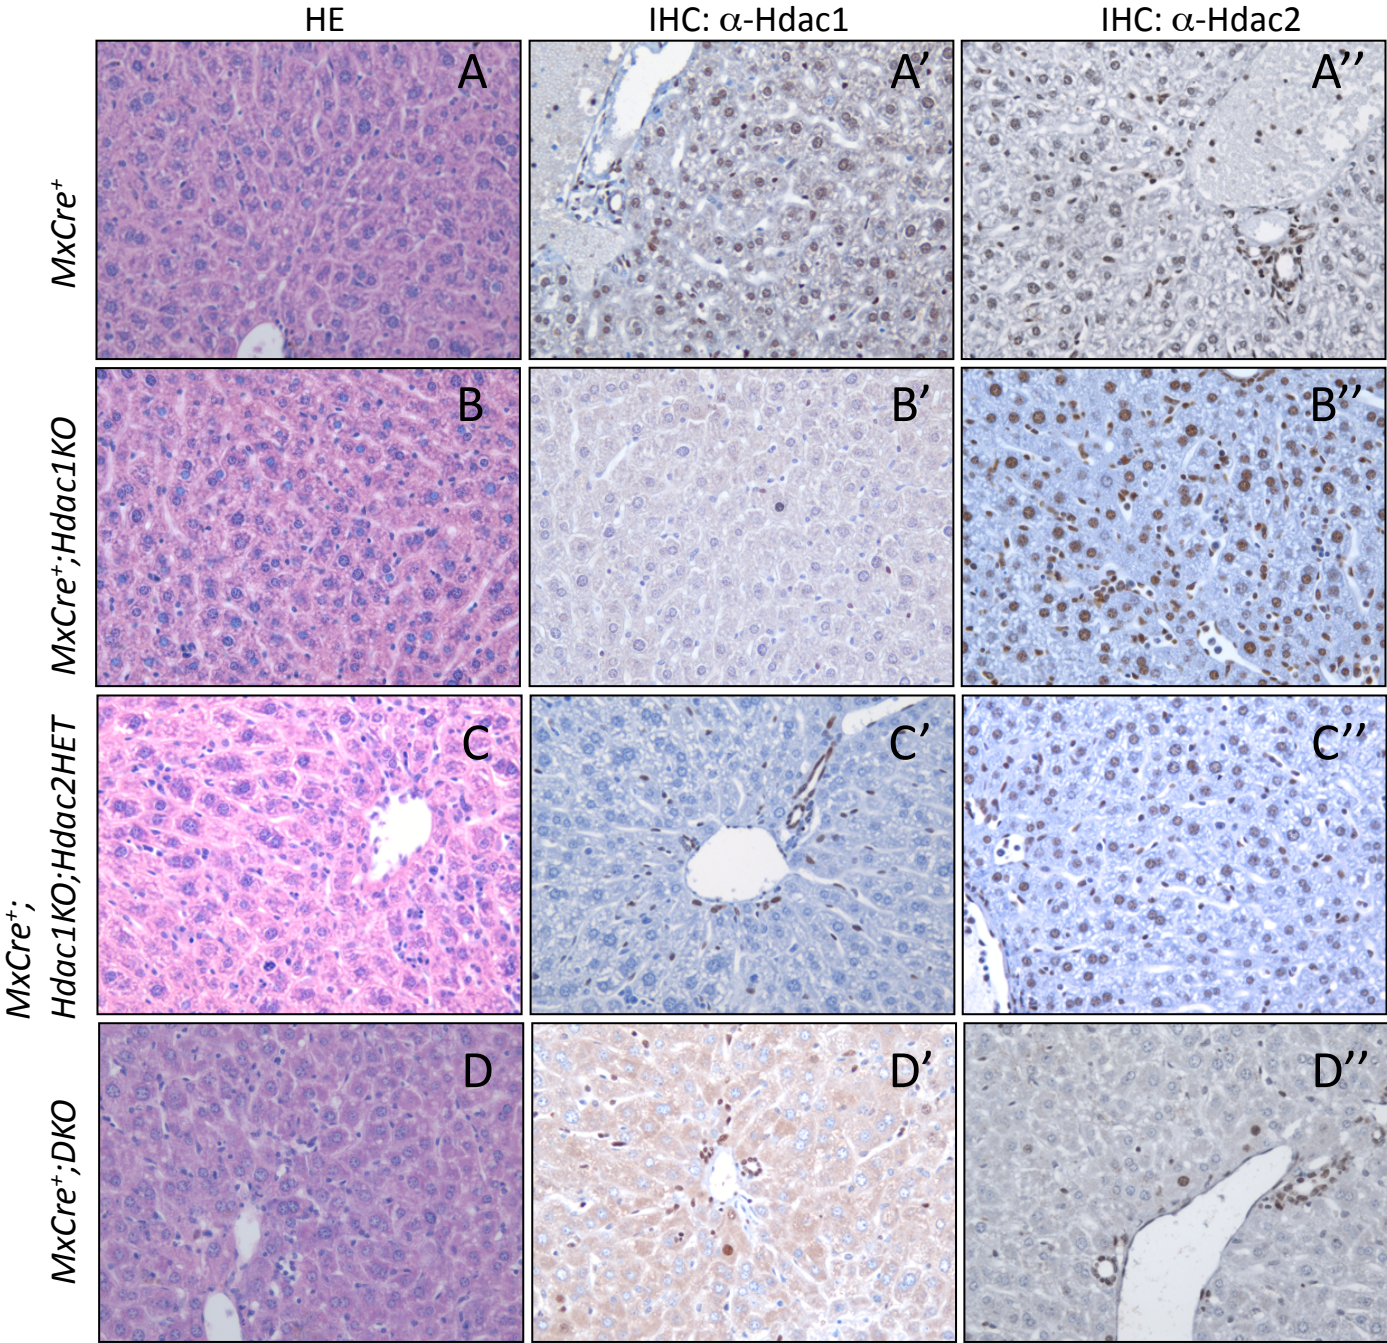

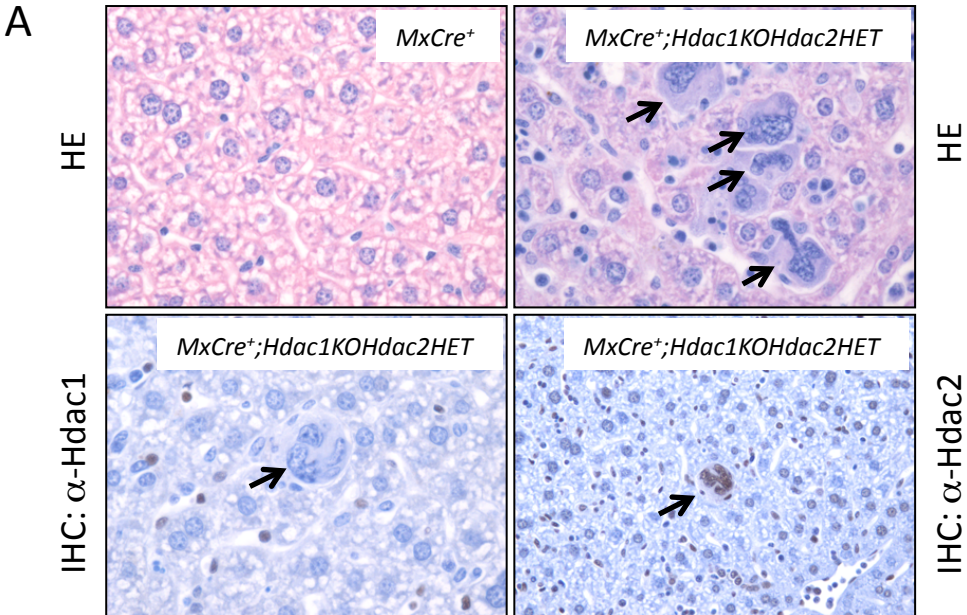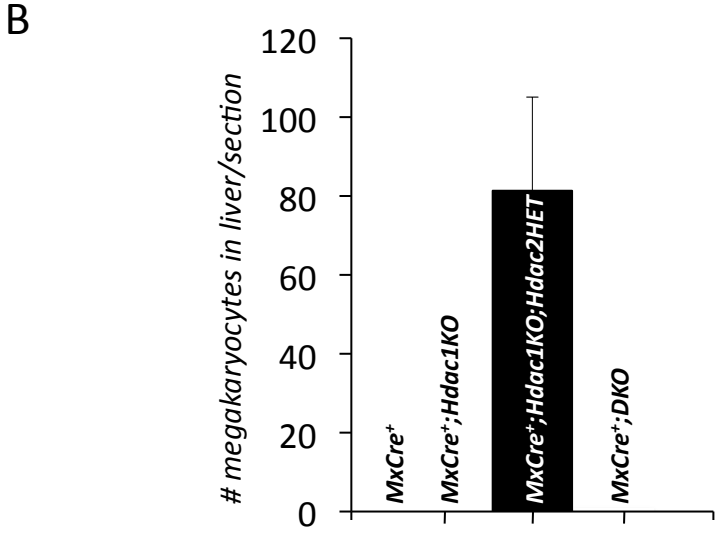

## Legends of supplementary figures.

**Supplemental Figure 1.** A. Schematic representation of wild-type (*Hdac1*<sup>WT</sup>), conditional knock-out (*Hdac1*<sup>cKO</sup>) and null-allele (*Hdac1*<sup>KO</sup>) of Hdac1. Black arrow heads indicate the position of *loxP* sequences. Arrows indicate primers used for genotype purposes. B. Western blot analysis of protein lysates from tamoxifen (4-OHT) treated (200 nM) *RCM2*<sup>+</sup>;*Hdac1*<sup>L/+</sup>;*Hdac2*<sup>+/-</sup> and *RCM2*<sup>+</sup>;*Hdac1*<sup>LL</sup>;*Hdac2*<sup>-/-</sup> MEFs. Asterix indicates a background signal, which becomes visible only in the absence of Hdac2.

**Supplemental Figure 2.** A. Sequence analysis of wild-type Hdac1 and Hdac1<sup>D99A</sup> and Hdac1<sup>Y303F</sup> mutants B. Sequence analysis of wild-type Hdac2 and Hdac2<sup>D100A</sup> and Hdac1<sup>Y304F</sup> mutants. Boxed areas indicate the amino acid substitution in the Hdac1 and Hdac2 mutants. C/D. Hdac activity of wild-type and mutant Hdac1 (C) or Hdac2 (D) as measured by incubating immunoprecipitated wild-type and mutant Hdac1 or Hdac2 with a fluorogenic acetylated substrate. Hdac activity is presented as percentage activity relative to the Hdac activity of wild-type Hdac1 and Hdac2. Hdac1 and Hdac2 western blot analysis of 293T total cell lysates containing wild-type or mutant Hdac1 or Hdac2, as used for immunoprecipitation. Cdk4 served as a loading control.

**Supplemental Figure 3.** A. Westernblot analysis of protein lysates of *Hdac2*<sup>+/+</sup>, *Hdac2*<sup>+/-</sup> and *Hdac2*<sup>-/-</sup> MEFs expressing either control shRNA or *Hdac1* shRNA. Note the up regulation of Hdac2 upon knockdown of Hdac1. Cdk4 was used as loading control. B. Cell cycle analysis of *Hdac2*<sup>+/+</sup> and *Hdac2*<sup>-/-</sup> MEFs expressing empty vector (V), a control shRNA (C) or *Hdac1* shRNA (KD) using BrdU-PI FACS. C. Growth curve analysis of *Hdac2*<sup>+/+</sup> and *Hdac2*<sup>-/-</sup> MEFs expressing either empty vector (squares), control shRNA (diamonds) and *Hdac1* shRNA (open circles). D. Senescence-associated  $\beta$ -galactosidase staining of *Hdac2*<sup>-/-</sup> MEFs expressing either control shRNA or *Hdac1* shRNA.

**Supplemental Figure 4.** Representative photographs of hematoxylin-eosin stained bone-marrow sections of *MxCre*<sup>+</sup> (A), *MxCre*<sup>+</sup>;*Hdac1*<sup>KO</sup> (B) and *MxCre*<sup>+</sup>;*Hdac1*<sup>KO</sup>;*Hdac2*<sup>HET</sup> (C) and *MxCre*<sup>+</sup>;*DKO* (D) mice. Immunohistochemistry using antibodies against Hdac1 (A'-D') and Hdac2 (A''-D'')

reveals efficient deletion of Hdac1 in bone marrow of *MxCre<sup>+</sup>;Hdac1KO* and *MxCre<sup>+</sup>;Hdac1KO;Hdac2HET* mice and efficient deletion of Hdac2 in bone marrow of *MxCre<sup>+</sup>;DKO* mice.

**Supplemental Figure 5.** Representative photographs of hematoxylin-eosin stained liver sections of *MxCre<sup>+</sup>* (A), *MxCre<sup>+</sup>;Hdac1KO* (B) and *MxCre<sup>+</sup>;Hdac1KO;Hdac2HET* (C) and *MxCre<sup>+</sup>;DKO* (D) mice. Immunohistochemistry using antibodies against Hdac1 (A'-D') and Hdac2 (A''-D'') reveals efficient deletion of Hdac1 in liver of *MxCre<sup>+</sup>;Hdac1KO* and *MxCre<sup>+</sup>;Hdac1KO;Hdac2HET* mice and efficient deletion of Hdac2 in liver of *MxCre<sup>+</sup>;DKO* mice.

**Supplemental Figure 6.** A. Representative photographs of hematoxylin-eosin or  $\alpha$ -Hdac1 and  $\alpha$ -Hdac2 stained liver sections of *MxCre<sup>+</sup>* and *MxCre<sup>+</sup>;Hdac1KO;Hdac2HET* mice. Arrows indicate megakaryocytes. B. Average megakaryocyte counts in *MxCre<sup>+</sup>*, *MxCre<sup>+</sup>;Hdac1KO*, *MxCre<sup>+</sup>;Hdac1KO;Hdac2HET* and *MxCre<sup>+</sup>;DKO* liver as counted in liver sections of 3 independent mice of each genotype.
